# Supplementary material for: Empagliflozin Ammeliorates High Glucose Induced-Cardiac Dysfuntion in Human iPSC-Derived Cardiomyocytes
Source: PubMed Central journal article supplement (PMC6173708; doi:10.1038/s41598-018-33293-2), 2018-10-05
Supplement: 41598_2018_33293_MOESM1_ESM.pdf [file 41598_2018_33293_MOESM1_ESM.pdf]

**EMPAGLIFLOZIN AMMELIORATES HIGH GLUCOSE INDUCED-CARDIAC DYSFUNTION IN  
HUMAN IPSC-DERIVED CARDIOMYOCYTES**

Kwong-Man NG, PhD; Yee-Man LAU, PhD; Vidhu DHANDHANIA, BSc; Zhujun CAI, BSc;  
Yee-Ki LEE, PhD; Wing-Hon LAI, PhD; Hung-Fat TSE, MD, PhD and  
Chung-Wah SIU, MD

**Supplementary information**

Supplementary Figure S1

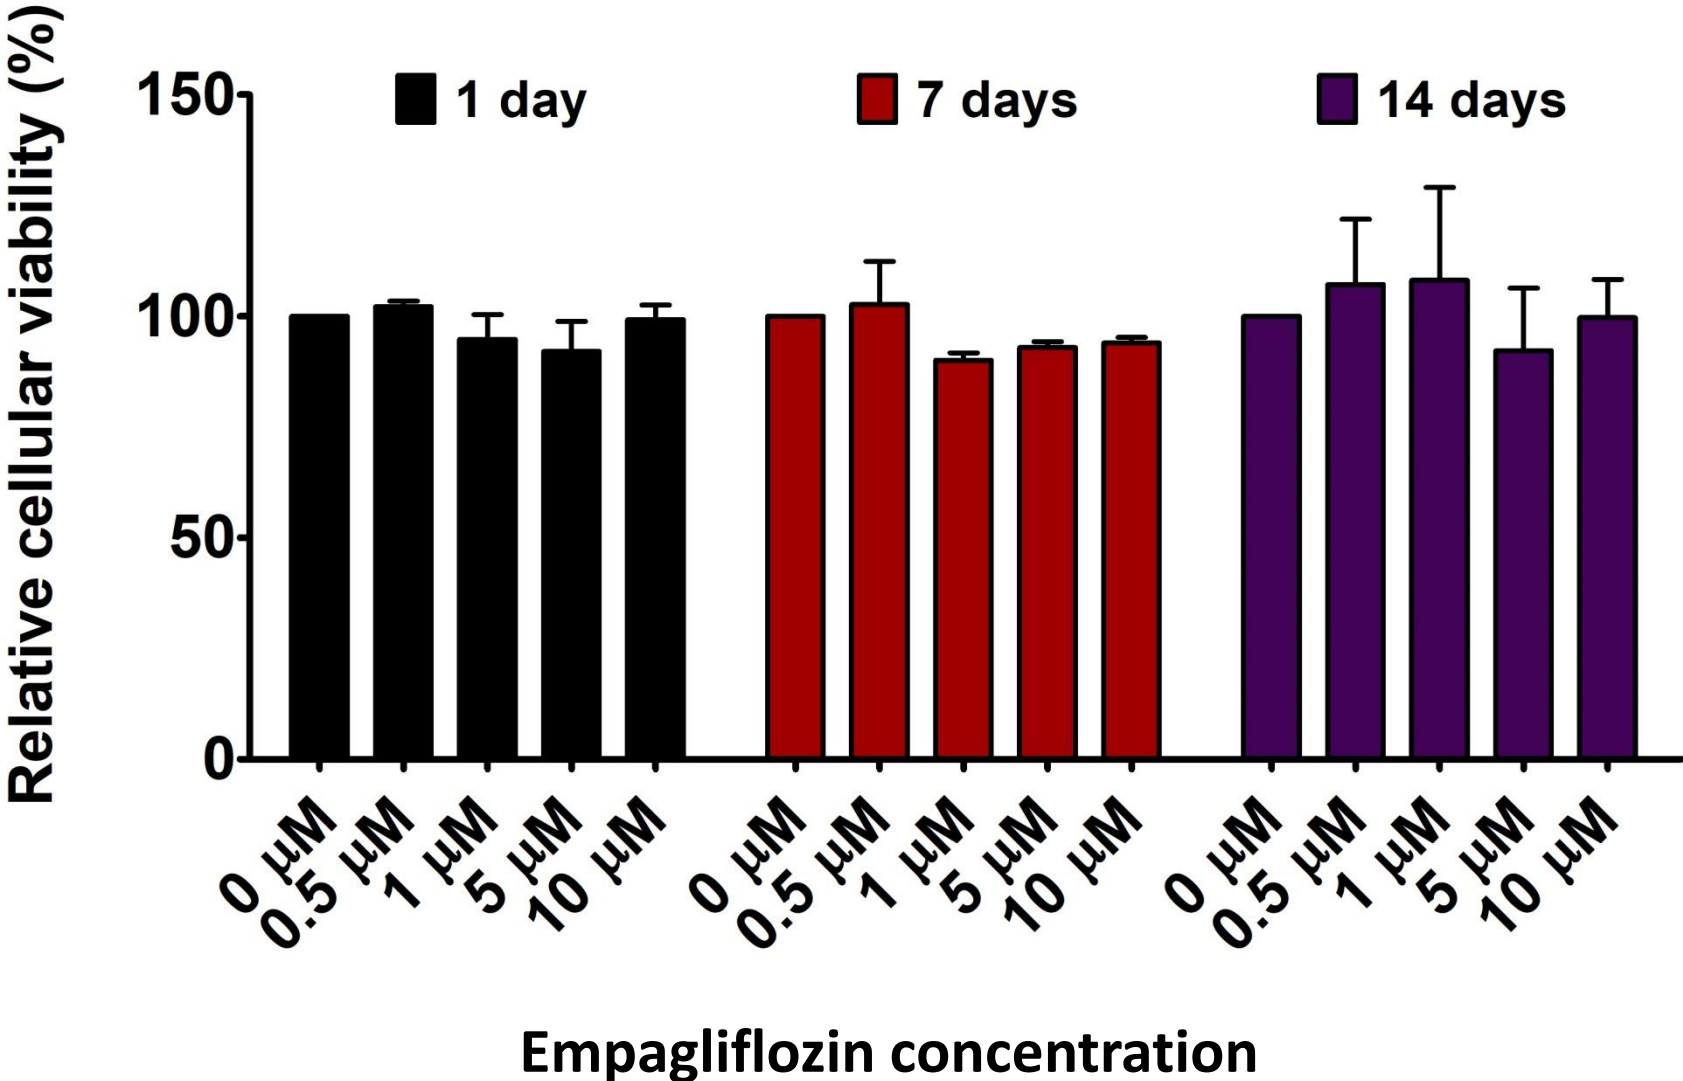

Supplementary Figure S2

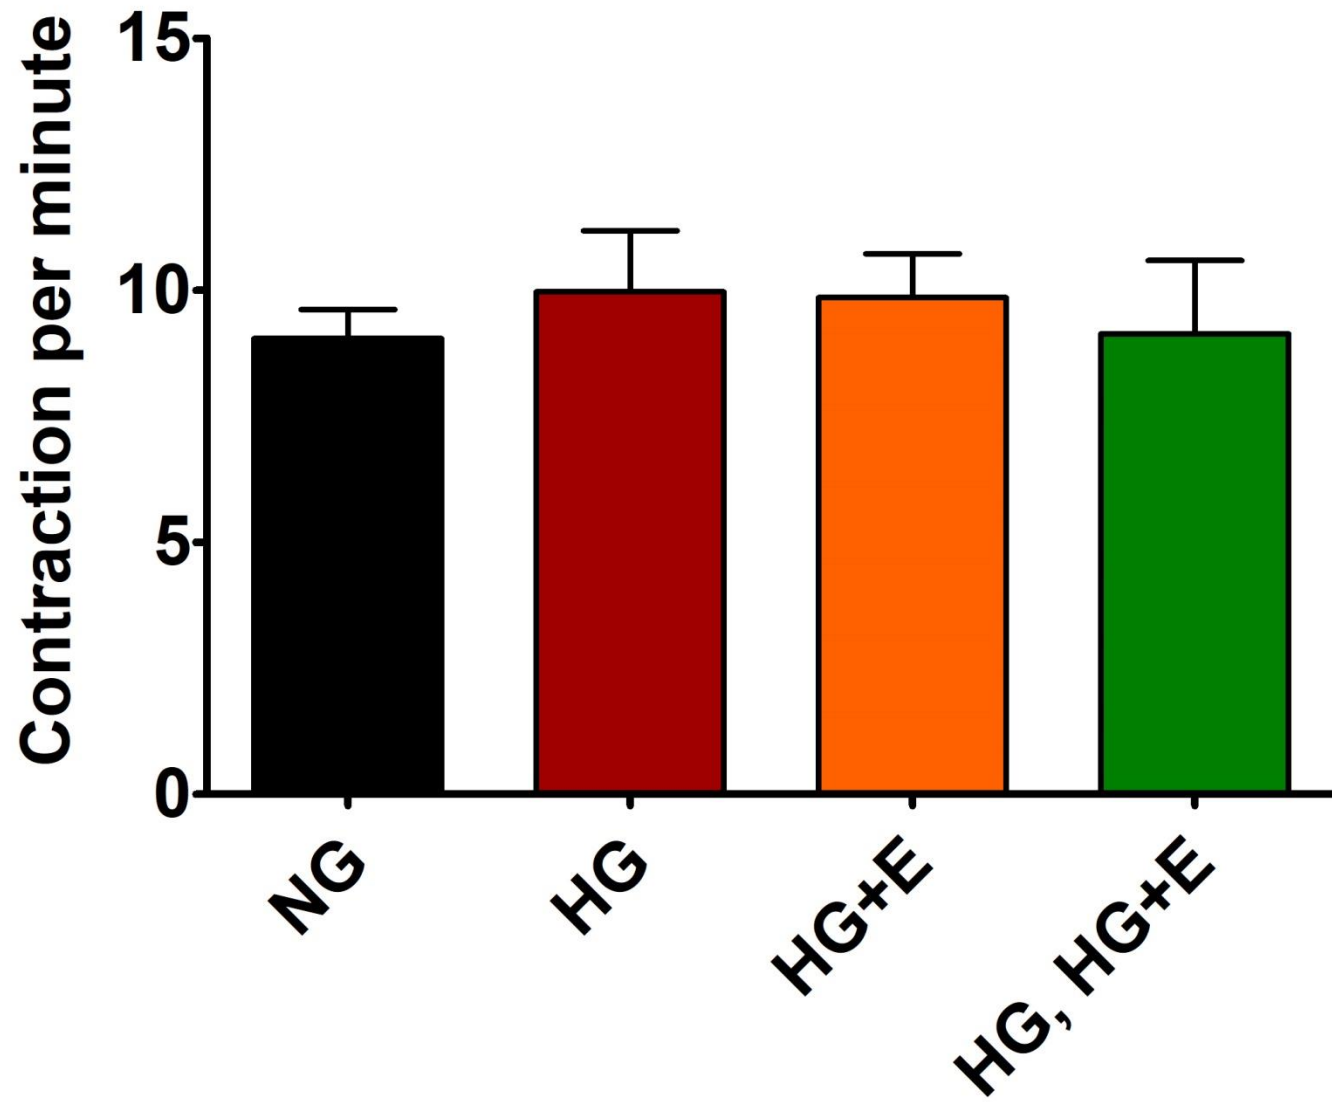

Supplementary Figure S3

A

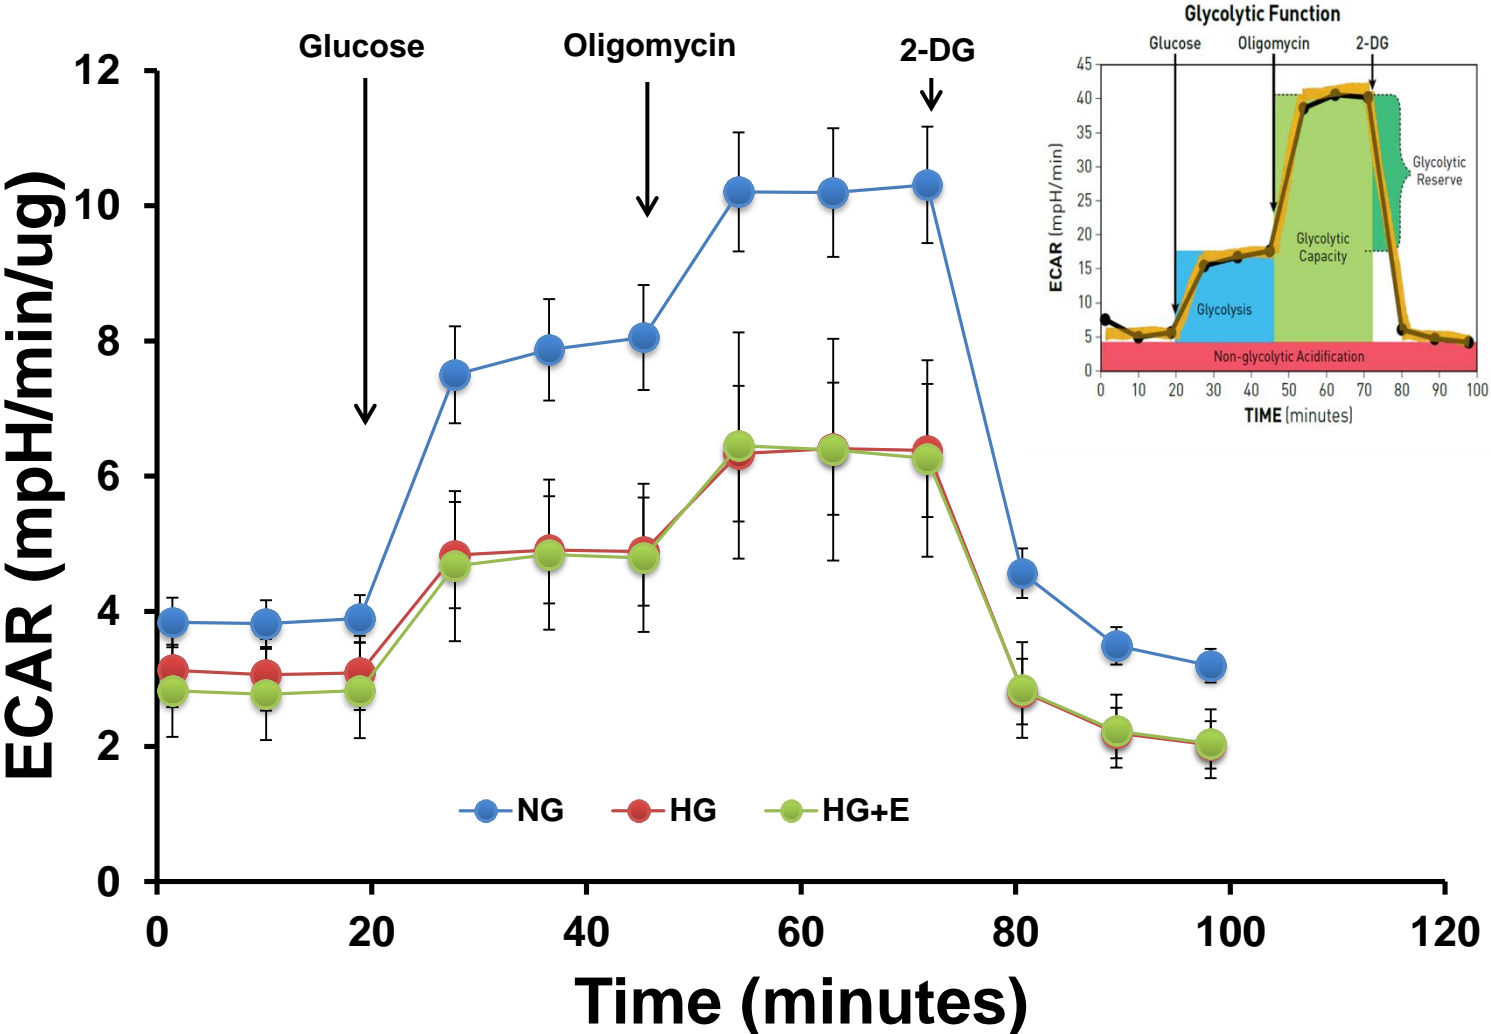

**B**

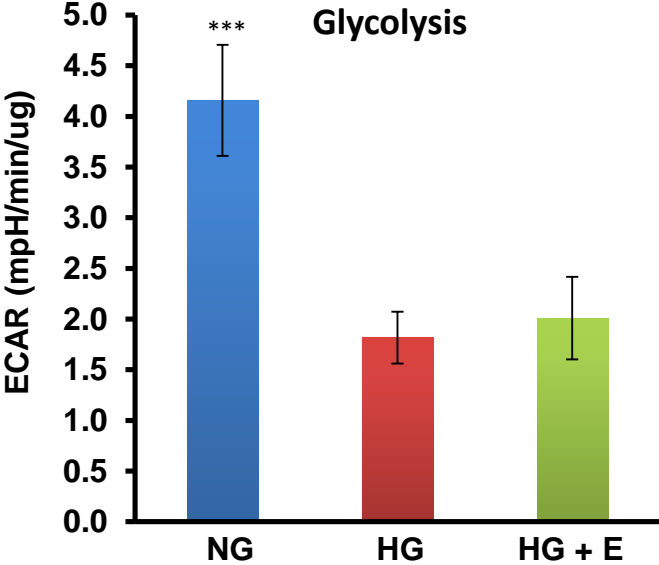

**C**

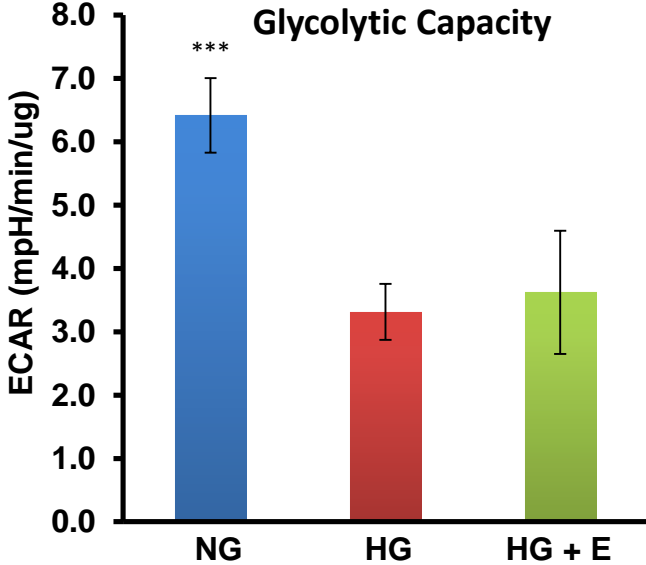

# Supplementary Figure S4

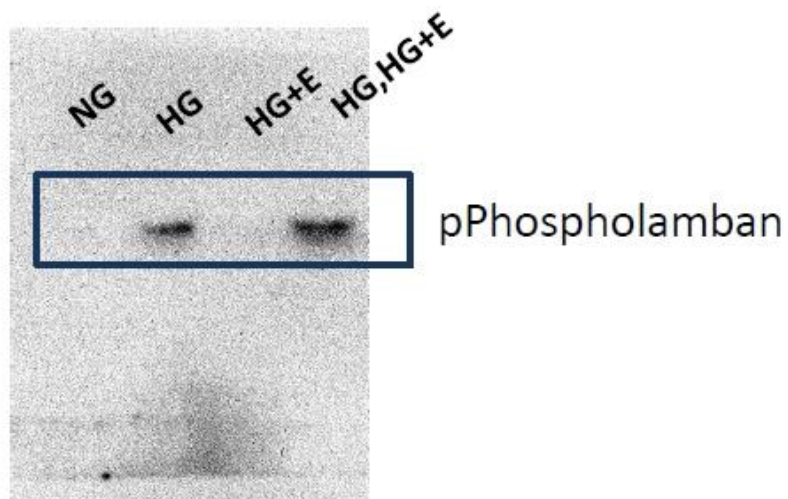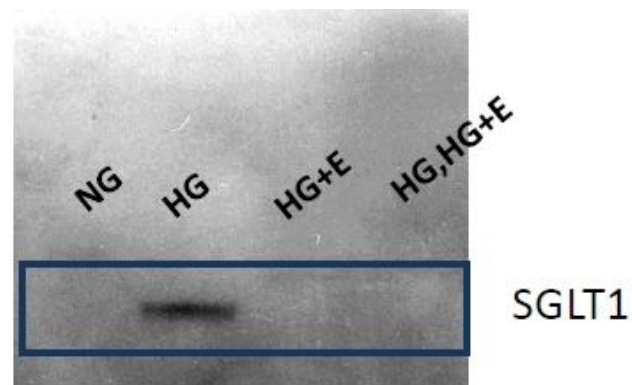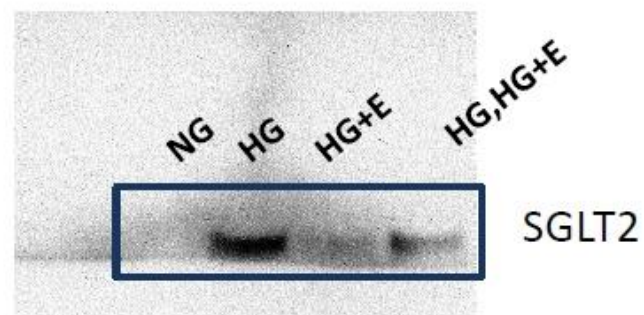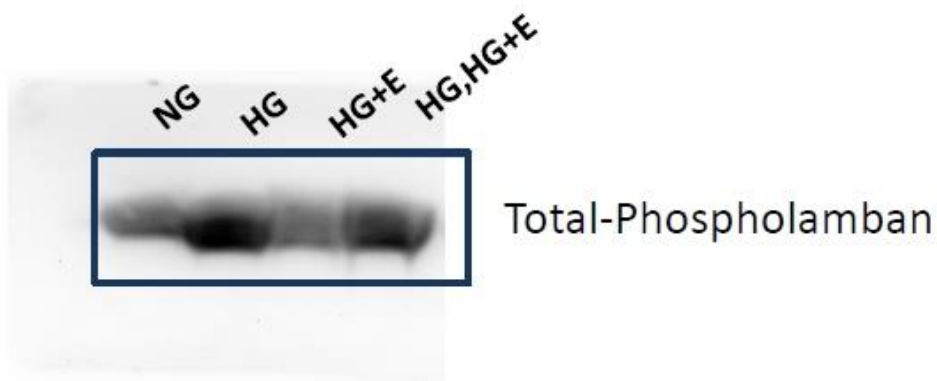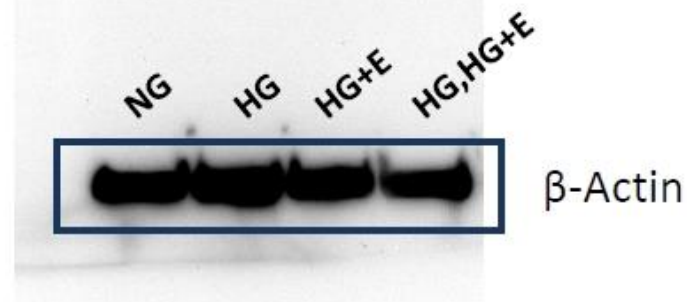

Original Blots of the Western Blot images

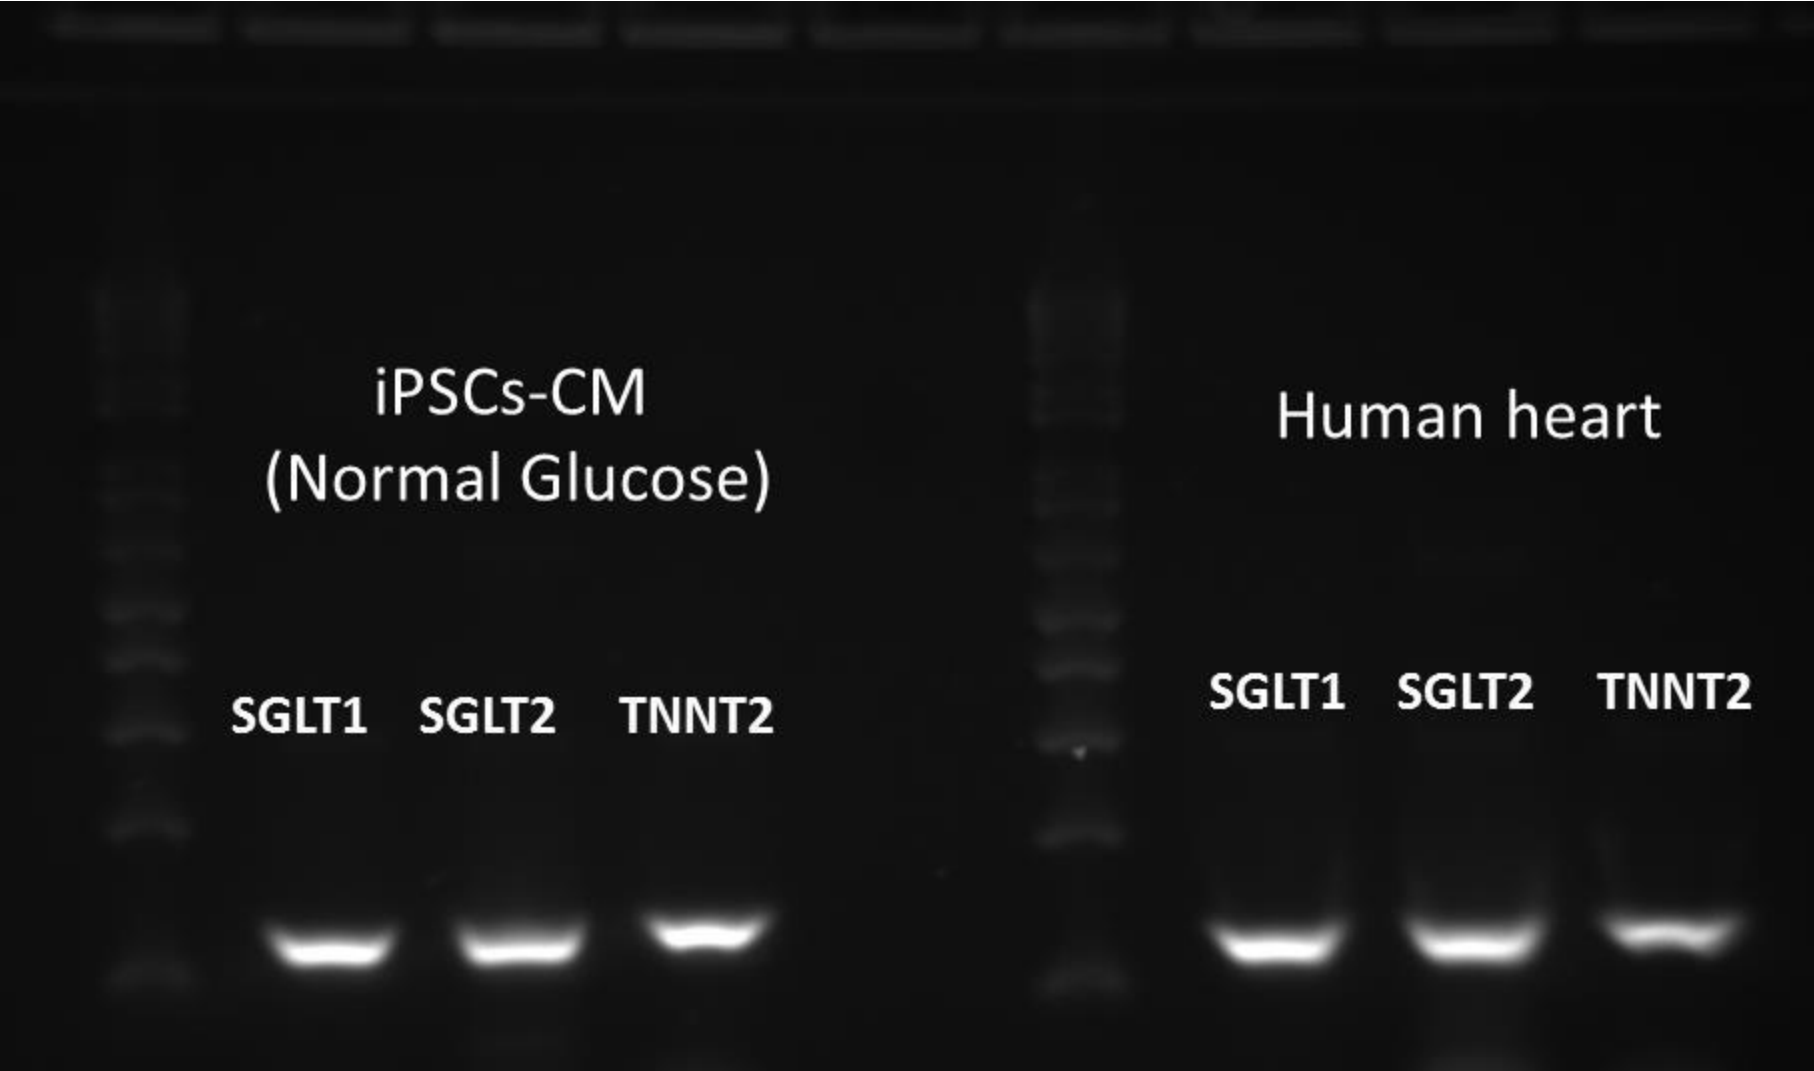

Full gel picture for Figure 6B

## Supplementary Table S1. Oligonucleotide primers used in quantitative PCR analysis

| Gene of interest               | Other name    | Primers Sequences                                   |
|--------------------------------|---------------|-----------------------------------------------------|
| <i>GLUT1</i>                   | <i>SLC2A1</i> | F: ATTCCAAGTGTGAGTCGCC<br>R: TTGCTGGCTGGAGAAAGGAG   |
| <i>GLUT2</i>                   | <i>SLC2A2</i> | F: CATTGCGGACTTCTGTGGAC<br>R: GCTGAGCCACTCTTCTTTTGG |
| <i>GLUT3</i>                   | <i>SLC2A3</i> | F: GTCAATGTGCAGTGTAGCCC<br>R: AAGGGAAAGGGAGACTGAGC  |
| <i>GLUT4</i>                   | <i>SLC2A4</i> | F: CTTCTTTTCTCTGCAGCAC<br>R: AGTCACACGAGGGGAATGAG   |
| <i>SGLT1</i>                   | <i>SCL5A1</i> | F: TCTACATCCCATCCCCATTC<br>R: GAGGAACTTGGTGGTCATGG  |
| <i>SGLT2</i>                   | <i>SCL5A2</i> | F: ACCATAAGCCACAGCCTCAC<br>R: ACTGCCAATCAGATGCAGTG  |
| <i>TNNT2</i>                   |               | F: GAATGAAGATCAGCTGAG<br>R: TTATCGTTGATCCTGTTTC     |
| <i>RYR2</i>                    |               | F: CGTTCTAACCAGCATCTCATC<br>R: CGAGCAATACAACCTGACC  |
| <i>ATP2A2</i>                  |               | F: ACCCACATTTCGAGTTGGAAG<br>R: CAGTGGGTTGTCATGAGTGG |
| <i>NCX1</i>                    |               | F: TGTGCATCTCAGCAATGTCA<br>R: TGATGCCAATGCTCTCACTC  |
| <i>ACTA1</i>                   |               | F: AGAGCTACGAGCTGCCAGAC<br>R: CGACTCCATACCGATGAAGG  |
| <i>MLC2<math>\alpha</math></i> |               | F: GGAGAAGCTCAATGGGACAG<br>R: CCACCTCAGCTGGAGAGAAC  |
| <i>FHL</i>                     |               | F: AGTGTGGTGGCCTATGAAGG<br>R: GCTCCTGGTGGAAAACAAAG  |



## Supplementary Figure Legends

**Supplementary Figure S1.** The cellular viabilities were evaluated using the Cell Counting Kit-8 Cell Proliferation / Cytotoxicity Assay Kit (Dojindo molecular technology inc. Maryland, USA). The cellular viability of the untreated control group (0 $\mu$ M empagliflozin) was set to 100% and was used as a reference for comparison.

**Supplementary Figure S2.** Contraction rates of cardiomyocytes derived from KS1 hiPSCs.

**Supplementary Figure S3.** Effects of High Glucose and Empagliflozin on Bioenergetics of hiPSC-Derived Cardiomyocytes. (A) Representative Seahorse profiles of hiPSC-derived cardiomyocytes for glycolytic stress testing. Real-time trace of the extracellular acidification rate (ECAR) was determined with a Seahorse XFe24 analyzer. After baseline measurements, cells were subsequently treated with 10 mM glucose, 1  $\mu$ M oligomycin and 50 mM 2-deoxyglucose (2-DG). The inset shows the schematic of glycolysis stress test. ECAR following the addition of glucose defines glycolysis and ECAR following oligomycin represents the maximum glycolytic capacity. ECAR following treatment with 2-DG represents acidification associated with non-glycolytic activity. (B) The bar charts show the calculated glycolysis and (C) glycolytic capacity. Each data point represents mean  $\pm$  SEM, n=3. Abbreviations: NG: normal glucose (5.5mM); HG: high glucose (22 mM); and HG+E: high glucose and empagliflozin. \*\*\*: p<0.001

**Supplementary Figure S4.** Original blots of Western Blot images.

**Supplementary Figure S5.** Full gel picture of PCR analysis images

**Supplementary Table S1.** List of oligonucleotide primers used in the quantitative PCR analysis.
